# Supplementary material for: An Open Pilot Study of the Effect and Tolerability of Add-On Multivitamin Therapy in Patients with Intractable Focal Epilepsy
Source: PubMed Central journal article supplement (PMC7468939; doi:10.3390/nu12082359), 2020-08-07

Table S1: Seizure severity and serum vitamin level of the patients at baseline and after 1, 3 and 6 months of multivitamin supplementation.

|                           | <b>Baseline</b>   | <b>1 month</b>  | <b>3 months</b> | <b>6 months</b> |
|---------------------------|-------------------|-----------------|-----------------|-----------------|
| <b>Characteristics</b>    | <b>Mean±SD</b>    | <b>Mean±SD</b>  | <b>Mean±SD</b>  | <b>Mean±SD</b>  |
| <b>Frequency, 28 days</b> | 8.12±17.24        | 6.26±13.90      | 3.21±6.94       | 2.06±3.89       |
| <b>Response, %</b>        | 0                 | -19.29±70.53    | -39.53±55.99    | -40.37±57.57    |
| <b>Vitamins</b>           |                   |                 |                 |                 |
| <b>B6, nmol/L</b>         | 240.73±233.02     | 189.27±143.49   | 169.68±143.80   | 200.75±237.34   |
| <b>B9, ng/ml</b>          | 8.26±4.13         | 37.88±22.63     | 56.62±52.84     | 48.40±32.38     |
| <b>D, ng/ml</b>           | 27.70±13.91       | 30.92±12.52     | 34.17±11.89     | 33.90±11.55     |
| <b>E, nmol/mL</b>         | 29.46±45.13       | 35.00±56.61     | 40.18±61.03     | 29.47±51.44     |
| <b>Q10, ng/ml</b>         | 2,953.44±1,161.09 | 2,742.68±960.48 | 2,332.63±595.32 | 1,725.32±450.91 |

Data are presented as mean±SD. Abbreviations: B6, pyridoxal 5'-phosphate (PLP); B9, total folate; D, total 25-hydroxyvitamin D; E, total human vitamin E; Q10, total coenzyme Q10.

Figure S1: Correlations between serum vitamin levels in the refractory epilepsy patients.

### Correlations between vitamin levels and treatment response

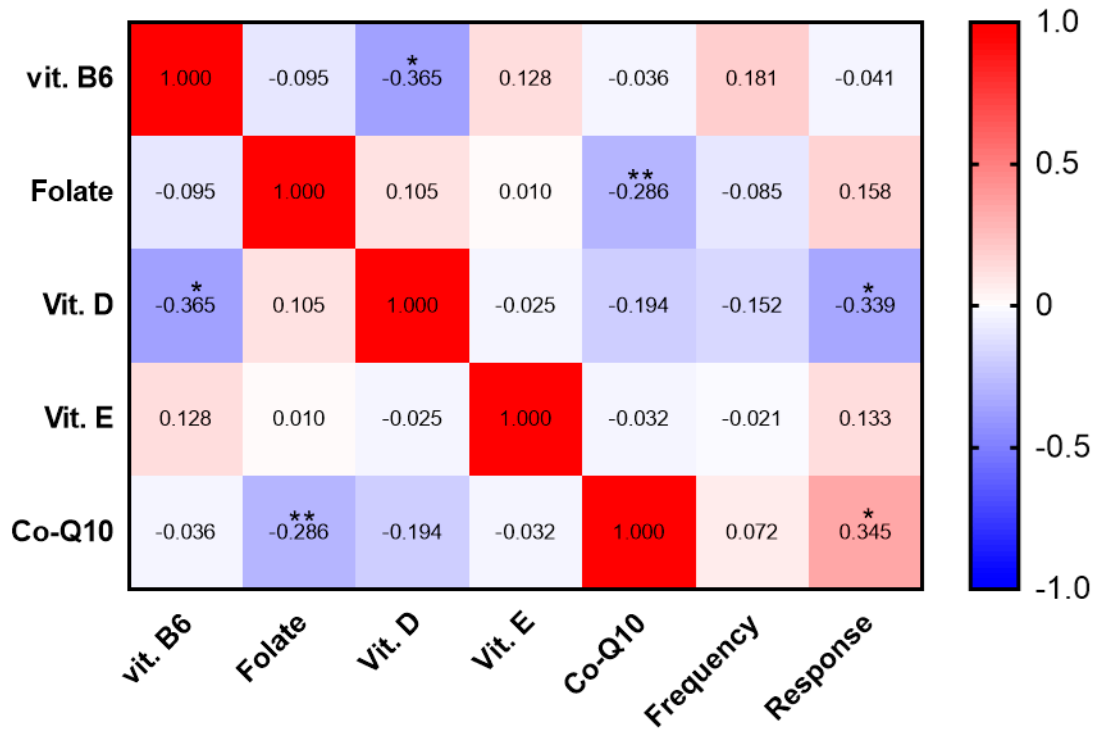

Supplement: nutrients-12-02359-s001.pdf [file nutrients-12-02359-s001.pdf]
